# Supplementary material
Source: PubMed Central journal article supplement (PMC5017918)

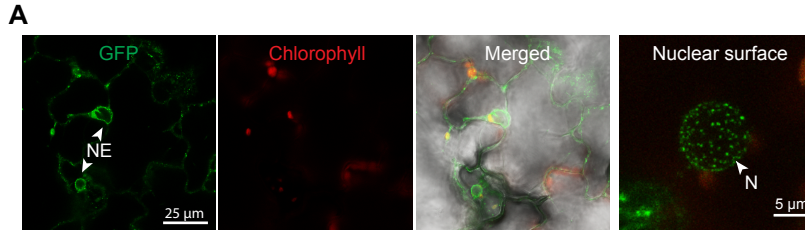

**C**

■ TMD    ■ Predicted omission region    ■ Peptide observed

LKEGTRANDLKTVEIGLQIR**ELRCK**ETALGLK**FESNNL**GKA**A**ALELDVSK**AAFRAR**FKTELEDTRKEEMVTRIMD**WLLVSVF**SL**ASMLV**GVY**NF**SIKRIED

|           |           |                |       |
|-----------|-----------|----------------|-------|
| TVEIGLQIR | FESNNLQK  | FKTELEDTR      | RIED- |
| TVEIGLQIR | FESNNLQK  | FKTELEDTR      | RIED- |
| TVEIGLQIR | FESNNLQK  | FKTELEDTR      | RIED- |
| TVEIGLQIR | FESNNLQK  | FKTELEDTR      | RIED- |
| TVEIGLQIR | AALELDVSK | FKTELEDTR      | RIED- |
| TVEIGLQIR | AALELDVSK | FKTELEDTR      | IED-  |
| TVEIGLQIR | AALELDVSK | FKTELEDTR      | IED-  |
| TVEIGLQIR | AALELDVSK | FKTELEDTRK     | IED-  |
| TVEIGLQIR | CKETALGLK | FKTELEDTRK     | IED-  |
|           |           | TELEDTR        | IED-  |
|           |           | TELEDTRK       |       |
|           |           | TELEDTRKEEMVTR |       |
|           |           | TELEDTRKEEMVTR |       |
|           |           | KEEMVTR        |       |

ATSVCDQSEEEKSSWWPKQVSSINSGFNTFCIR**RVWVQIF**FG**LMI**VF**TYELNKR**SS**GT**KOT**MPISFV****FLGIF**GVGS**KL**CVDTLGGDG**KLWLVW**EV

|              |                 |             |
|--------------|-----------------|-------------|
| -ATSVCDQSEEK | QVSSINSGFNTFCIR | LCVDTLGGDGK |
| -ATSVCDQSEEK | QVSSINSGFNTFCIR | LCVDTLGGDGK |
| -ATSVCDQSEEK | QVSSINSGFNTFCIR |             |
| -ATSVCDQSEEK | QVSSINSGFNTFCIR |             |
| -ATSVCDQSEEK |                 |             |
| SSSWVVPK     |                 |             |
| SSSWVVPK     |                 |             |

**EC**L**Q**P**AN**V**E**L**A**L**Y**G**L**M**E**G**P**I**N**V**T**O**E**T**R**S**N**R**C**N**S**M**F**P**Y**W**A**R**R**S**W****Y****W**I**L**E**V**L**P****V**I**N**G**L**L**P****F**A**T**F**E**W**R**D**F**A**M**Y**H**L**H**G**G**S**D**Y**A**

|            |                |
|------------|----------------|
| CNSMFPYWAR | DFAMYHLHGGSDYA |
| CNSMFPYWAR | DFAMYHLHGGSDYA |
|            | DFAMYHLHGGSDYA |
|            | DFAMYHLHGGSDYA |

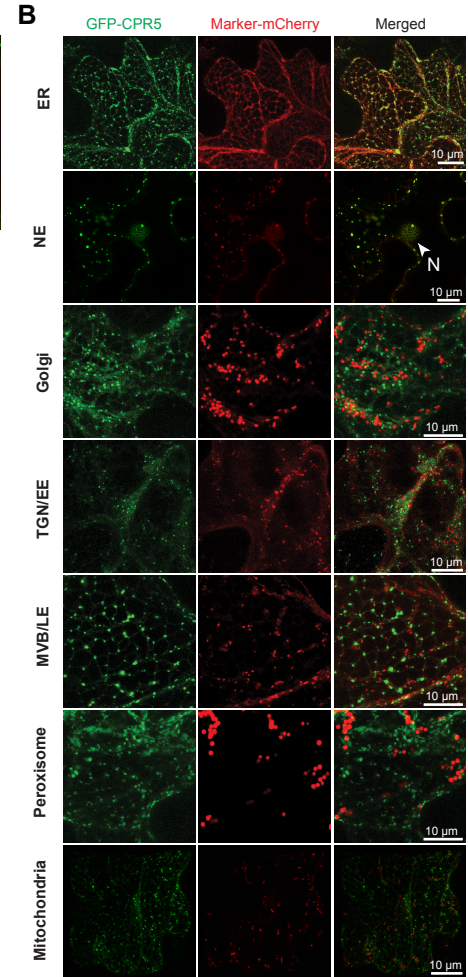

Supplement: NIHMS807512-supplement-1.pdf [file NIHMS807512-supplement-1.pdf]
