# Supplementary material
Source: PubMed Central journal article supplement (PMC5017918)

**A**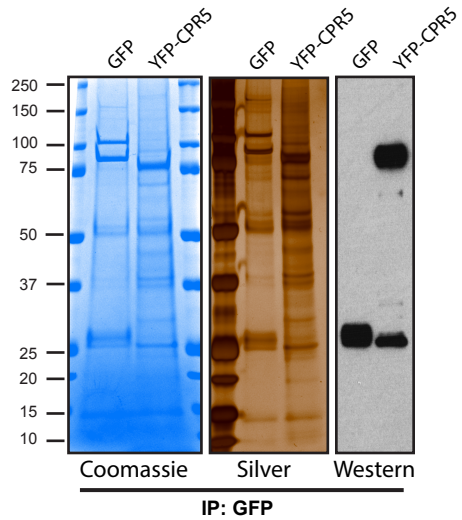**B**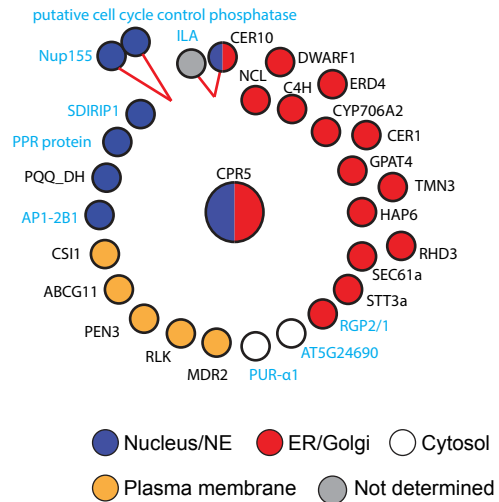**C**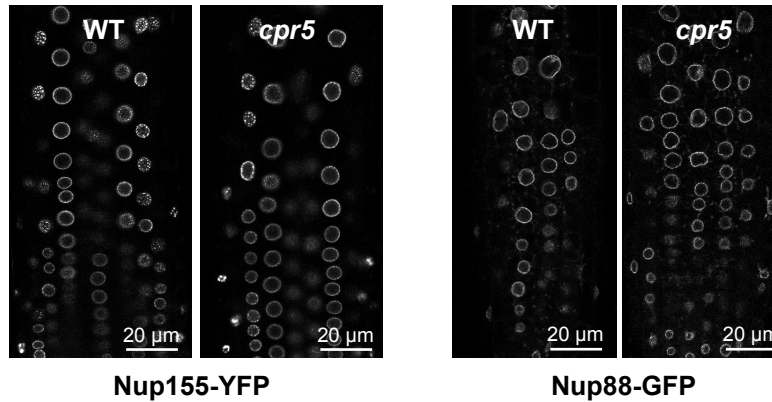

Supplement: NIHMS807512-supplement-2.pdf [file NIHMS807512-supplement-2.pdf]

**A**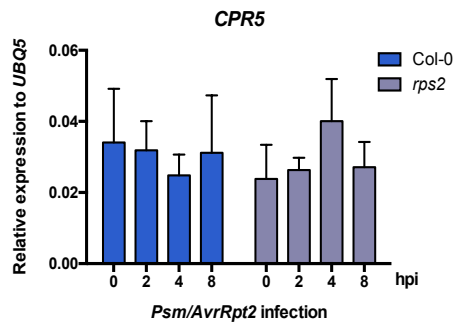**B**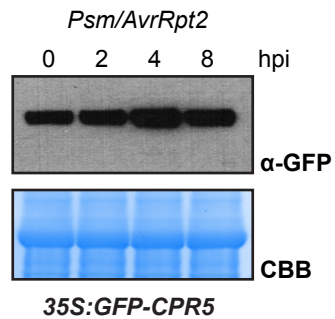**C**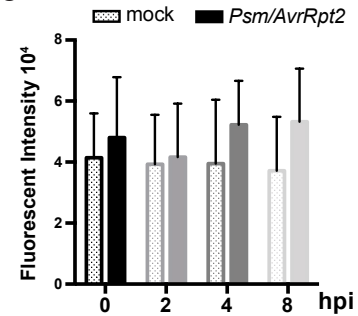**D**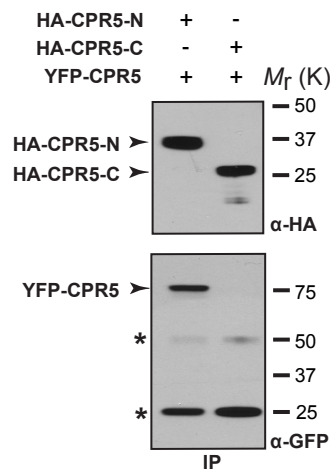**E**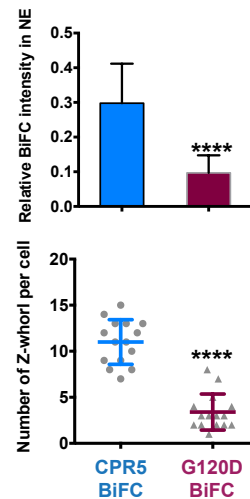

Supplement: NIHMS807512-supplement-5.pdf [file NIHMS807512-supplement-5.pdf]

**A**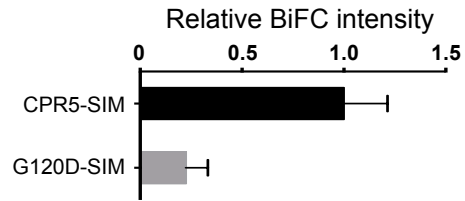**B**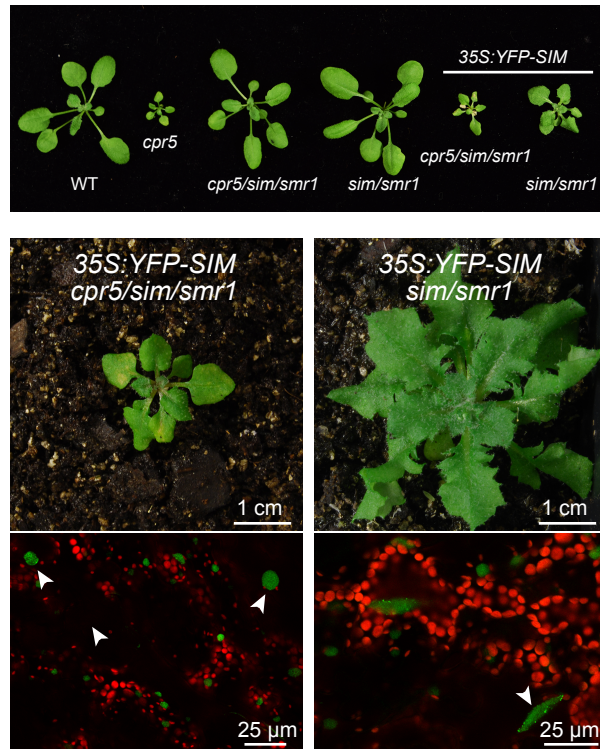

Supplement: NIHMS807512-supplement-6.pdf [file NIHMS807512-supplement-6.pdf]
